# Supplementary material
Source: PubMed Central journal article supplement (PMC3594446)
Supplement: NIHMS415350-supplement-Supp_FigureS1.pdf [file NIHMS415350-supplement-Supp_FigureS1.pdf]

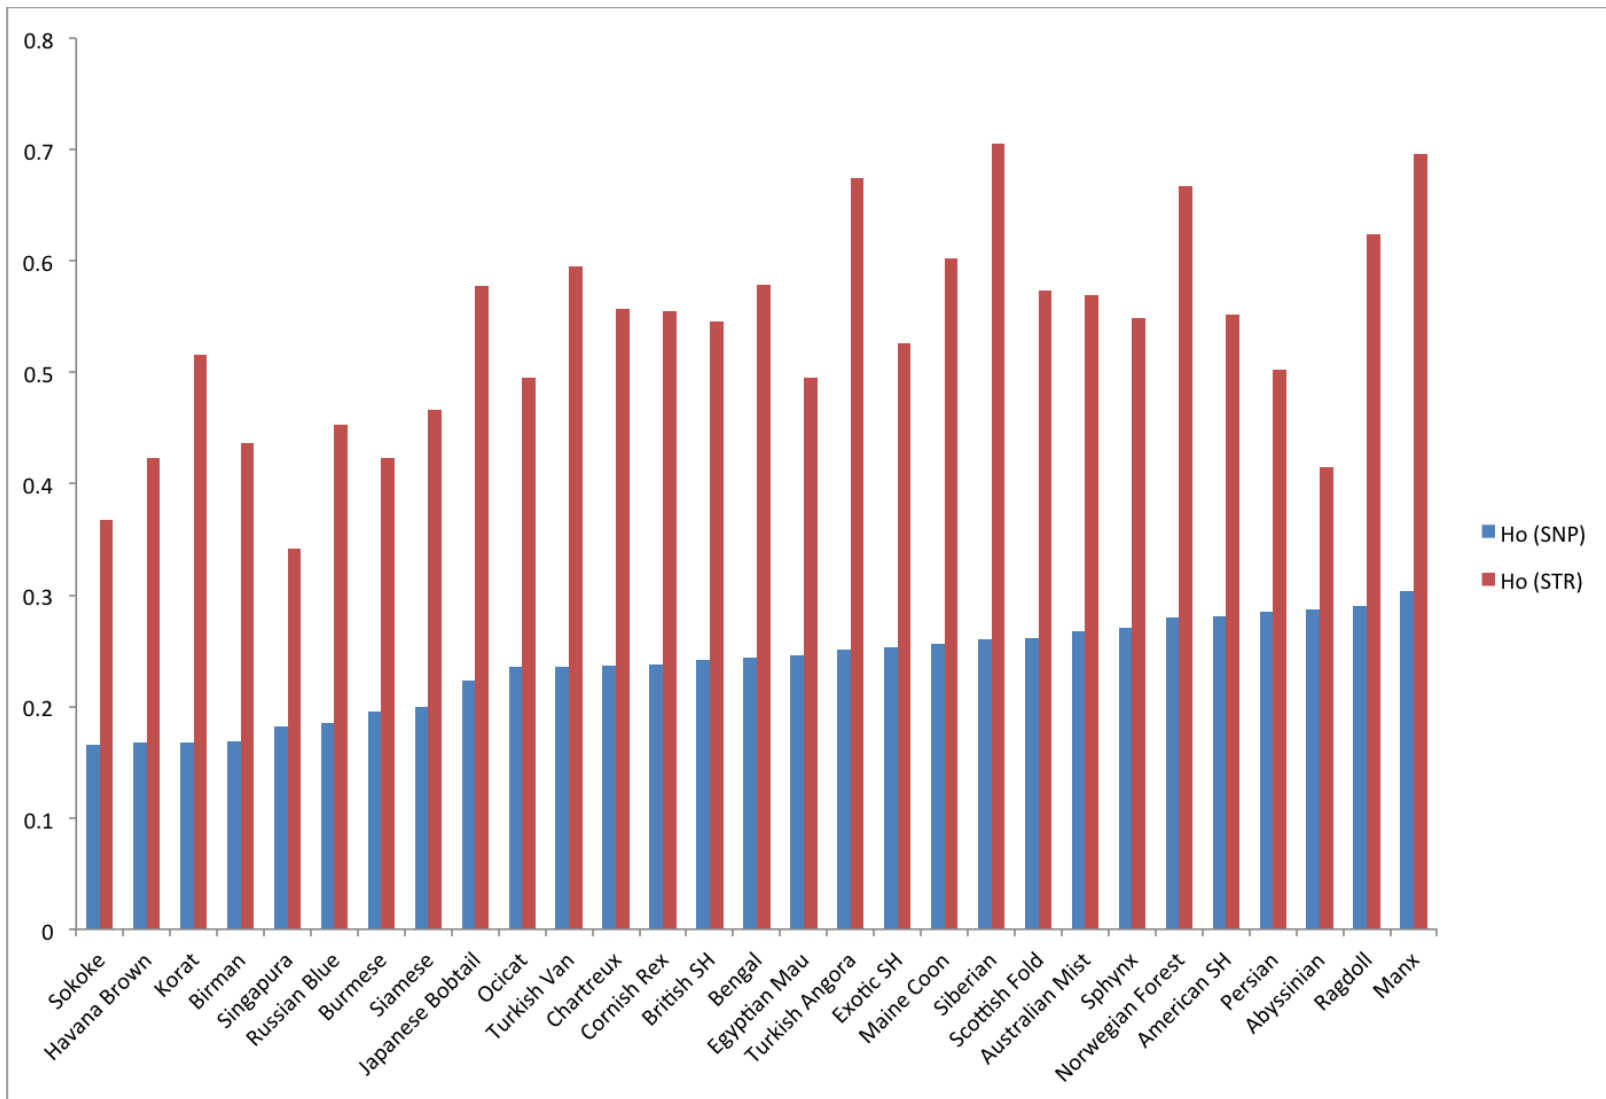

**Figure S1. Observed heterozygosity by breed.** Graph is in ascending order by SNP observed heterozygosity ( $H_0$ ).
