# Supplementary material
Source: PubMed Central journal article supplement (PMC3594446)
Supplement: NIHMS415350-supplement-Supp_FigureS2.pdf [file NIHMS415350-supplement-Supp_FigureS2.pdf]

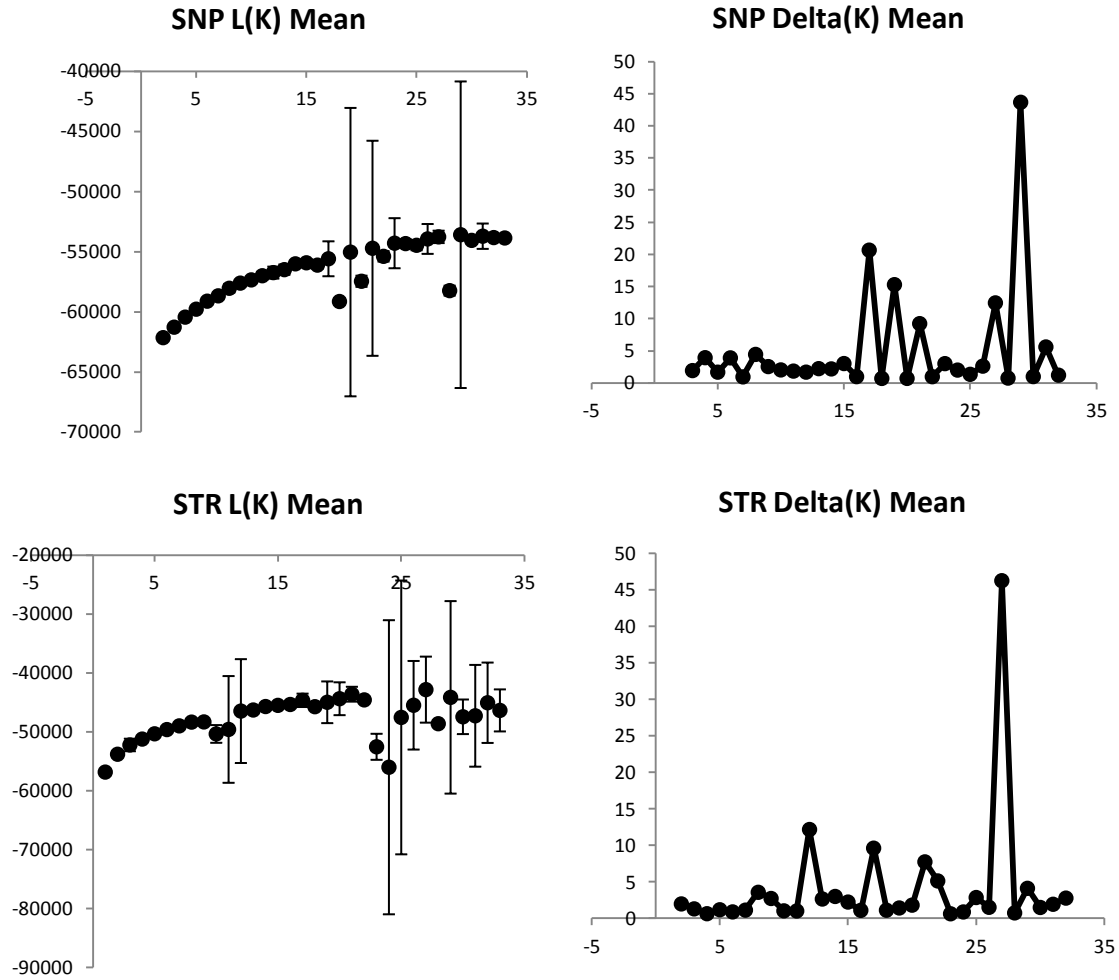

**Figure S2.** Log likelihood and  $\Delta K$  plots from the Bayesian clustering of cat breeds. Graphs display both the mean natural logarithm of the likelihood,  $L(K)$ , and the second order rate of change of  $L(K)$  with respect to  $K$ ,  $\Delta K$ , based on the results of Bayesian clustering. Points where a peaks in a  $\Delta K$  plot occur indicate population stratification with higher likelihood than those where valleys occur.
