# Supplementary material
Source: PubMed Central journal article supplement (PMC3594446)
Supplement: NIHMS415350-supplement-Supp_FigureS3.pdf [file NIHMS415350-supplement-Supp_FigureS3.pdf]

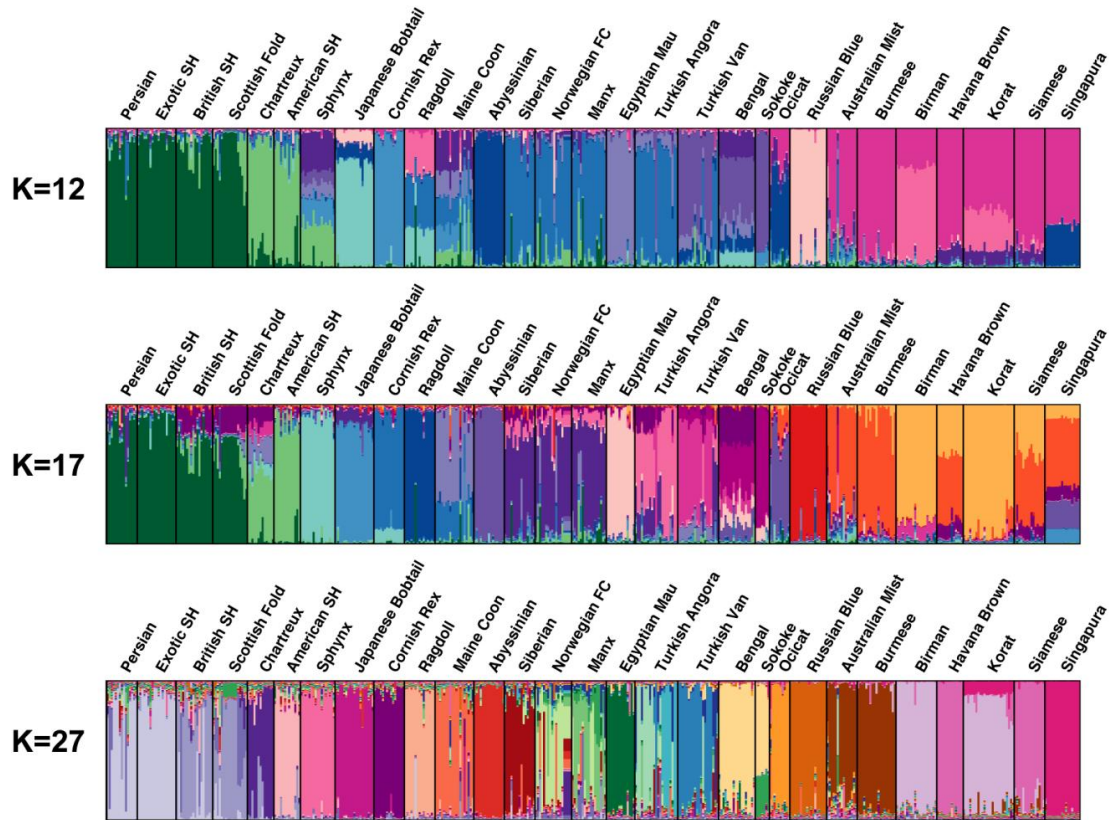

**Figure S3.** (a) Alternate plots of STR Bayesian clustering analysis of cat breeds.

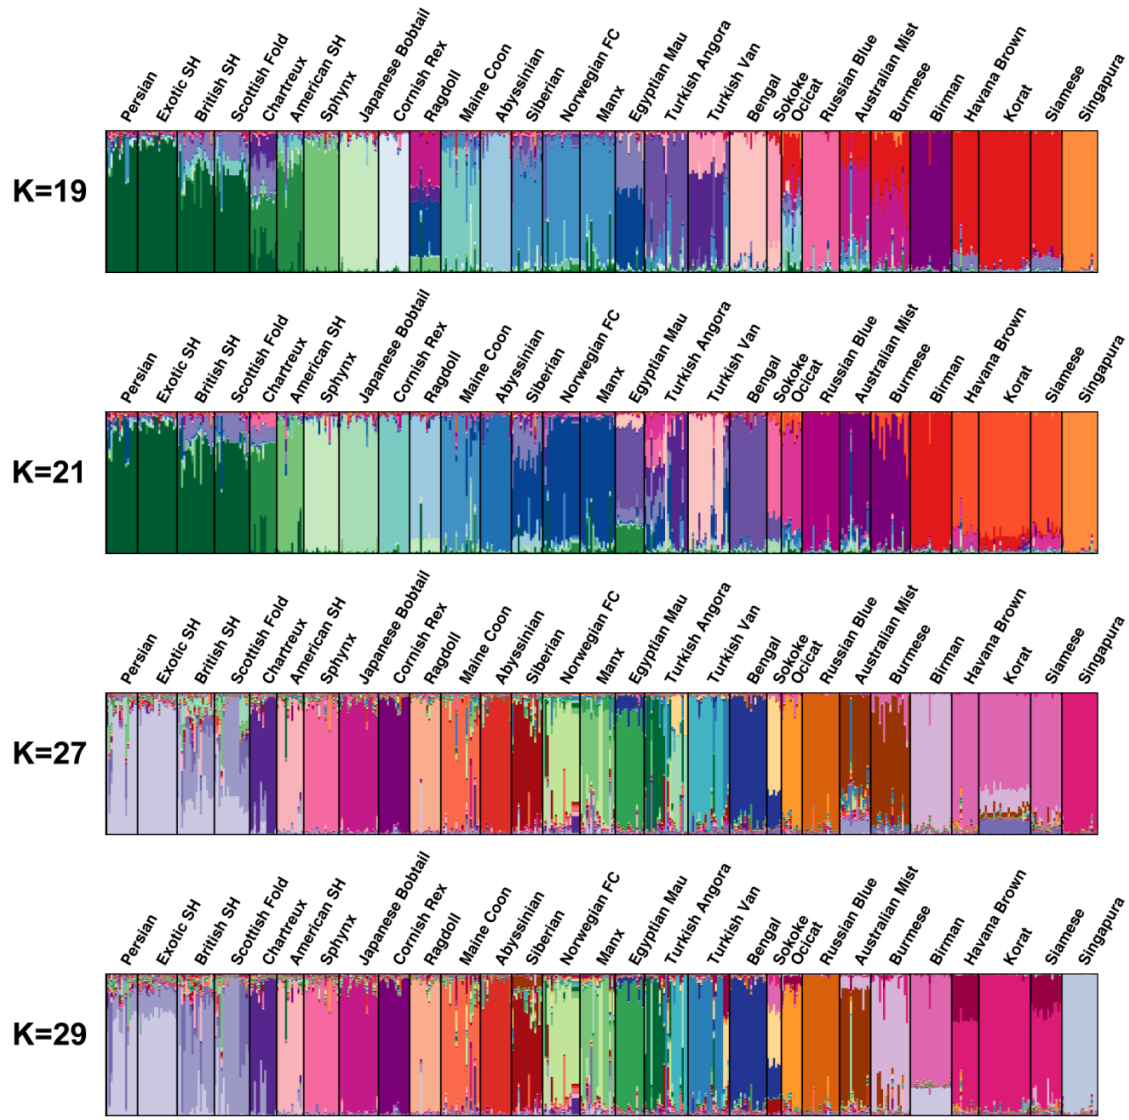

**Figure S3.** (b) Alternate plots of SNP Bayesian clustering analysis of cat breeds.
