# Supplementary material
Source: PubMed Central journal article supplement (PMC3594446)
Supplement: NIHMS415350-supplement-Supp_FigureS4.pdf [file NIHMS415350-supplement-Supp_FigureS4.pdf]

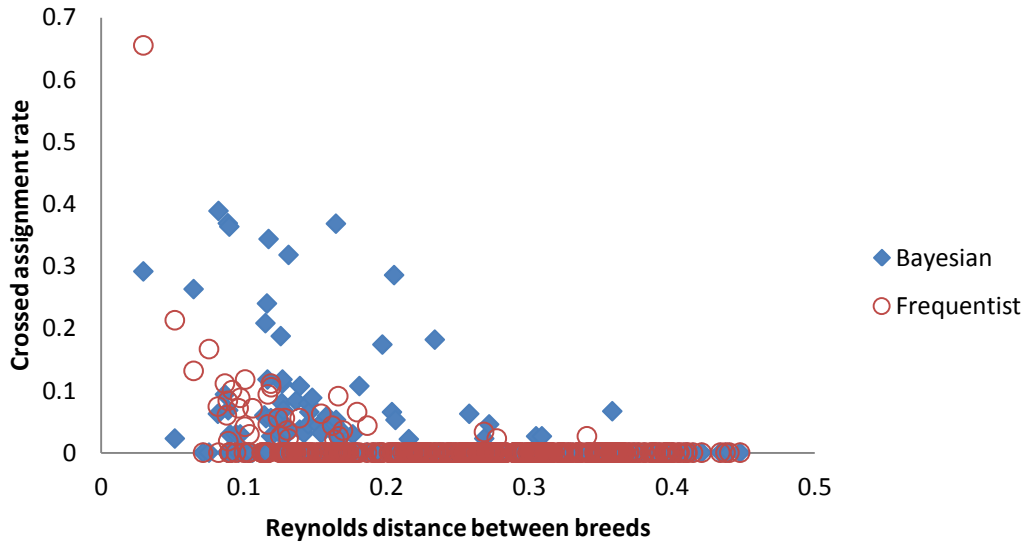

**Figure S4.** (a) Crossed assignment rate between breeds as a function of the Reynold's genetic distance between populations using SNPs.

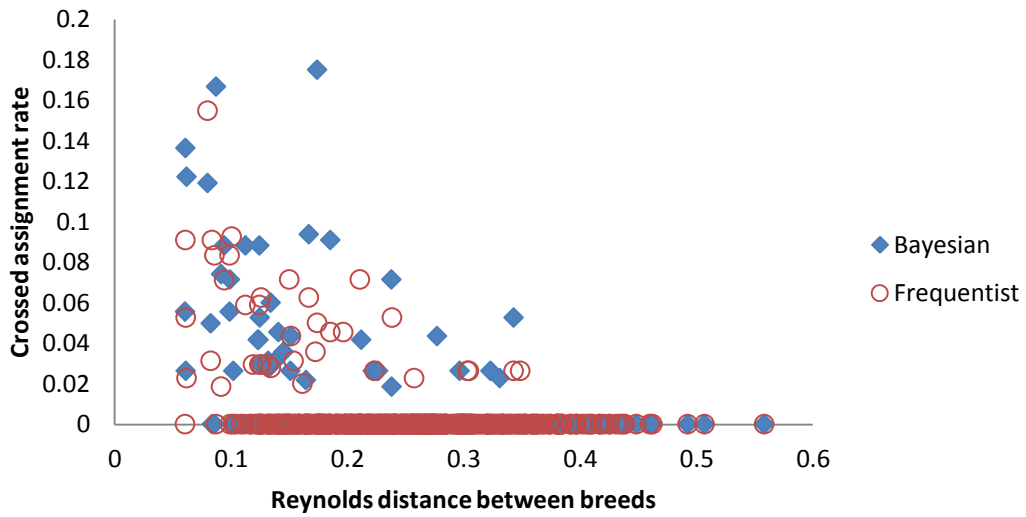

**Figure S4.** (b) Crossed assignment rate between breeds as a function of the Reynold's genetic distance between populations using STRs.
