# Supplementary material
Source: PubMed Central journal article supplement (PMC3594446)
Supplement: NIHMS415350-supplement-Supp_TableS2.pdf [file NIHMS415350-supplement-Supp_TableS2.pdf]

|                                  | Persian | Exotic SH | British SH | Scottish Fold | Chartreux | American SH | Sphynx | Japanese Bobtail | Cornish Rex | Ragdoll | Maine Coon | Abyssinian | Siberian | Norwegian FC | Manx | Egyptian Mau | Turkish Angora | Turkish Van | Bengal | Sokoke | Oicat | Russian Blue | Australian Mist | Burmese | Birman | Havana Brown | Korat | Siamese | Singapura | Total |
|----------------------------------|---------|-----------|------------|---------------|-----------|-------------|--------|------------------|-------------|---------|------------|------------|----------|--------------|------|--------------|----------------|-------------|--------|--------|-------|--------------|-----------------|---------|--------|--------------|-------|---------|-----------|-------|
| <b>chrB2</b><br><b>138312489</b> | ns      | ns        | ns         | ns            | ns        | ns          | ns     | ns               | ns          | ns      | ns         | ns         | ns       | ns           | •    | ns           | ns             | ns          | ns     | ns     | ns    | ns           | ns              | ns      | ns     | ns           | ns    | ns      | ns        | 1     |
| <b>chrB2</b><br><b>146660650</b> | ns      | ns        | ns         | ns            | ns        | ns          | ns     | ns               | ns          | ns      | ns         | ns         | ns       | ns           | ns   | ns           | ns             | ns          | ns     | ns     | ns    | ns           | ns              |         |        |              | ns    | ns      | ns        | 0     |
| <b>chrB2</b><br><b>41509834</b>  | ns      | ns        | ns         | ns            | ns        | ns          | ns     | ns               | ns          | ns      | ns         | ns         | ns       | ns           | •    | ns           | ns             | ns          | ns     | ns     | ns    | ns           | ns              | ns      | •      | ns           | ns    | ns      | ns        | 2     |
| <b>chrB2</b><br><b>45093345</b>  | ns      | ns        | ns         | ns            | ns        | ns          | ns     | ns               | ns          | ns      | ns         | ns         | ns       | ns           | ns   | ns           | ns             | ns          | ns     | ns     | ns    | ns           | ns              | ns      | ns     | ns           | ns    | ns      | ns        | 0     |
| <b>chrB2</b><br><b>6949528</b>   | ns      | ns        | ns         | ns            | ns        | ns          | ns     | ns               | ns          | ns      | ns         | ns         | ns       | ns           | ns   | ns           | ns             | •           | ns     | ns     | ns    | ns           | ns              | •       | •      | •            | •     | •       | •         | 7     |
| <b>chrB3</b><br><b>104483970</b> | ns      | ns        | ns         | ns            | ns        | ns          | ns     | ns               | ns          | ns      | ns         | ns         | ns       | ns           | ns   | ns           | •              | ns          | ns     | ns     | ns    | ns           | ns              | ns      | •      | ns           | ns    | ns      | ns        | 2     |
| <b>chrB3</b><br><b>111000326</b> | ns      | ns        | ns         | ns            | ns        | ns          | ns     | ns               | ns          | ns      | ns         | •          | •        | ns           | ns   | ns           | ns             | •           | ns     | ns     | ns    | ns           | ns              | •       | ns     | ns           | ns    | ns      | ns        | 4     |
| <b>chrB3</b><br><b>13666494</b>  | ns      | ns        | ns         | ns            | ns        | ns          | ns     | ns               | ns          | ns      | ns         | ns         | ns       | ns           | ns   | ns           | ns             | ns          | ns     | ns     | ns    | ns           | ns              | ns      | ns     | ns           | ns    | ns      | ns        | 0     |
| <b>chrB3</b><br><b>39203469</b>  | •       | •         | ns         | ns            | ns        | ns          | ns     | ns               | ns          | ns      | ns         | ns         | ns       | ns           | ns   | ns           | ns             | ns          | ns     | ns     | ns    | ns           | ns              | ns      |        | ns           | ns    | ns      | ns        | 2     |
| <b>chrB3</b><br><b>51317931</b>  | ns      | ns        | ns         | ns            | ns        | ns          | ns     | ns               | ns          | ns      | ns         | ns         | ns       | •            | ns   | ns           | ns             | ns          | ns     | ns     | ns    | •            | ns              | ns      | ns     | ns           | ns    | ns      | ns        | 2     |
| <b>chrB3</b><br><b>57141954</b>  | ns      | •         | ns         | ns            | ns        | ns          | ns     | ns               | ns          | ns      | ns         | ns         | ns       | ns           | ns   | ns           | ns             | ns          | ns     | ns     | ns    | ns           | ns              | ns      | •      | ns           | ns    | •       | ns        | 3     |
| <b>chrB3</b><br><b>77094074</b>  | ns      | ns        | ns         | ns            | ns        | ns          | ns     | •                | ns          | ns      | ns         | ns         | ns       | ns           | •    | ns           | ns             | ns          | ns     | ns     | ns    | •            | •               | ns      | ns     | ns           | ns    | ns      | ns        | 4     |
| <b>chrB4</b><br><b>105706694</b> | ns      | ns        | ns         | ns            | ns        | ns          | ns     | ns               | ns          | ns      | ns         | ns         | ns       | ns           | •    | ns           | ns             | •           | ns     | ns     | ns    | ns           | ns              | ns      |        | ns           | ns    | ns      | •         | 3     |
| <b>chrB4</b><br><b>142658074</b> | ns      | ns        | ns         | ns            | ns        | ns          | ns     | •                | ns          | ns      | ns         | ns         | ns       | ns           | ns   | ns           | ns             | ns          | ns     | ns     | ns    | •            | ns              | ns      | ns     | ns           | ns    | ns      | ns        | 2     |
| <b>chrB4</b><br><b>143006494</b> | ns      | ns        | ns         | ns            | ns        | •           | ns     | ns               | ns          | ns      | ns         | ns         | ns       | ns           | ns   | ns           | ns             | ns          | ns     | ns     | ns    | ns           | •               | •       |        | ns           | ns    | ns      | ns        | 3     |
| <b>chrB4</b><br><b>144693308</b> | ns      | ns        | ns         | ns            | ns        | ns          | ns     | ns               | ns          | ns      | ns         | ns         | ns       | ns           | •    | ns           | ns             | ns          | ns     | ns     | ns    | ns           | ns              | ns      | ns     | ns           | ns    | ns      | ns        | 1     |
| <b>chrB4</b><br><b>146486983</b> | ns      | ns        | ns         | ns            | ns        | •           | ns     | ns               | ns          | ns      | ns         | ns         | ns       | ns           | ns   | ns           | ns             | ns          | ns     | ns     | ns    | •            | ns              | •       | ns     | ns           | ns    | ns      | •         | 4     |
| <b>chrB4</b><br><b>147206961</b> | ns      | ns        | ns         | ns            | ns        | ns          | ns     | ns               | ns          | ns      | ns         | ns         | •        | ns           | ns   | ns           | ns             | ns          | ns     | ns     | ns    | ns           | ns              | ns      | ns     | ns           | ns    | ns      | ns        | 1     |
| <b>chrB4</b><br><b>149532846</b> | ns      | ns        | ns         | ns            | ns        | ns          | ns     | ns               | ns          | ns      | ns         | ns         | ns       | ns           | •    | •            | ns             | ns          | •      | ns     | ns    | •            |                 |         |        |              | ns    | ns      | ns        | 4     |



|                                  | Persian | Exotic SH | British SH | Scottish Fold | Chartreux | American SH | Sphynx | Japanese Bobtail | Cornish Rex | Ragdoll | Maine Coon | Abyssinian | Siberian | Norwegian FC | Manx | Egyptian Mau | Turkish Angora | Turkish Van | Bengal | Sokoke | Ocicat | Russian Blue | Australian Mist | Burmese | Birman | Havana Brown | Korat | Siamese | Singapura | Total |
|----------------------------------|---------|-----------|------------|---------------|-----------|-------------|--------|------------------|-------------|---------|------------|------------|----------|--------------|------|--------------|----------------|-------------|--------|--------|--------|--------------|-----------------|---------|--------|--------------|-------|---------|-----------|-------|
| <b>chrC2</b><br><b>147124460</b> | ns      | ns        | ns         | ns            | ns        | ns          | ns     | ns               | ns          | ns      | ns         | ns         | ns       | ns           | ns   | ns           | •              | ns          | ns     | ns     | ns     | ns           | ns              | ns      | ns     | ns           | ns    | ns      | ns        | 1     |
| <b>chrC2</b><br><b>150774106</b> | ns      | ns        | ns         | ns            | ns        | ns          | ns     | ns               | ns          | ns      | ns         | ns         | ns       | ns           | ns   | ns           | ns             | ns          | ns     | ns     | ns     | ns           | ns              |         |        |              |       |         |           | 0     |
| <b>chrC2</b><br><b>156491175</b> | ns      | ns        | ns         | ns            | ns        | ns          | ns     | ns               | ns          | ns      | ns         | ns         | ns       | ns           | ns   | ns           | •              | •           | ns     | ns     | ns     | ns           | ns              | ns      | ns     | ns           | ns    | ns      | ns        | 2     |
| <b>chrC2</b><br><b>187325</b>    | ns      | ns        | ns         | ns            | ns        | ns          | •      | ns               | ns          | ns      | ns         | ns         | •        | ns           | ns   | ns           | ns             | ns          | ns     | ns     | ns     | ns           | ns              | ns      | ns     | ns           | ns    | •       | ns        | 3     |
| <b>chrC2</b><br><b>262401</b>    | ns      | ns        | ns         | ns            | ns        | ns          | •      | •                | ns          | ns      | •          | ns         | ns       | ns           | ns   | ns           | ns             | ns          | ns     | ns     | ns     | •            | ns              | ns      | ns     | ns           | ns    | ns      | ns        | 4     |
| <b>chrC2</b><br><b>5215469</b>   | ns      | ns        | ns         | ns            | ns        | •           | ns     | ns               | ns          | ns      | ns         | ns         | ns       | ns           | ns   | ns           | ns             | ns          | ns     | ns     | ns     | •            | ns              | ns      | ns     | ns           | ns    | ns      | ns        | 2     |
| <b>chrD1</b><br><b>101321498</b> | •       | ns        | ns         | ns            | •         | ns          | ns     | •                | ns          | ns      | ns         | ns         | ns       | ns           | ns   | ns           | ns             | ns          | ns     | ns     | ns     | ns           | ns              | ns      | •      | ns           | •     | •       | •         | 7     |
| <b>chrD1</b><br><b>104941557</b> | ns      | ns        | •          | ns            | •         | ns          | ns     | ns               | ns          | ns      | ns         | ns         | ns       | ns           | ns   | ns           | ns             | ns          | ns     | ns     | ns     | ns           | ns              | ns      |        | ns           | ns    | ns      | ns        | 2     |
| <b>chrD1</b><br><b>105498119</b> | ns      | ns        | ns         | ns            | •         | ns          | ns     | •                | ns          | ns      | ns         | ns         | ns       | ns           | ns   | ns           | ns             | •           | ns     | ns     | ns     | ns           | ns              | ns      | ns     | ns           | ns    | ns      | ns        | 3     |
| <b>chrD1</b><br><b>10789012</b>  | ns      | ns        | ns         | ns            | ns        | ns          | ns     | ns               | ns          | ns      | •          | ns         | ns       | ns           | ns   | ns           | ns             | ns          | ns     | ns     | ns     | ns           | ns              | ns      |        | ns           | ns    | ns      | ns        | 1     |
| <b>chrD1</b><br><b>11484008</b>  | ns      | ns        | ns         | ns            | ns        | ns          | ns     | ns               | ns          | ns      | ns         | ns         | ns       | ns           | ns   | ns           | ns             | ns          | ns     | ns     | ns     | ns           | ns              | ns      |        | ns           | ns    | ns      | ns        | 0     |
| <b>chrD1</b><br><b>117527468</b> | ns      | ns        | ns         | ns            | ns        | ns          | ns     | ns               | ns          | ns      | ns         |            | ns       | ns           | ns   | ns           | ns             | ns          | ns     | ns     | ns     |              | ns              |         |        |              |       |         |           | 0     |
| <b>chrD1</b><br><b>125811329</b> | ns      | ns        | ns         | ns            | ns        | ns          | ns     | ns               | ns          | ns      | ns         | ns         | •        | ns           | ns   | ns           | ns             | ns          | ns     | ns     | ns     | •            | ns              | ns      | ns     | ns           | ns    | ns      | ns        | 2     |
| <b>chrD1</b><br><b>126256993</b> | ns      | ns        | ns         | ns            | ns        | •           | ns     | ns               | ns          | ns      | •          | ns         | ns       | •            | ns   | ns           | ns             | ns          | ns     | ns     | ns     | ns           | ns              | ns      | ns     | ns           | ns    | ns      | ns        | 3     |
| <b>chrD1</b><br><b>126847301</b> | ns      | ns        | ns         | ns            | ns        | ns          | ns     | ns               | ns          | ns      | ns         | ns         | •        | ns           | ns   | •            | •              | ns          | ns     | •      | ns     | ns           | ns              | ns      | ns     | ns           | ns    | ns      | ns        | 4     |
| <b>chrD1</b><br><b>15984279</b>  | ns      | ns        | ns         | ns            | ns        | ns          | ns     | ns               | ns          | ns      | ns         | ns         | ns       | ns           | ns   | ns           | ns             | ns          | ns     | ns     | ns     | ns           | ns              | ns      | •      | ns           | ns    | ns      | ns        | 1     |
| <b>chrD1</b><br><b>16242433</b>  | ns      | ns        | •          | ns            | ns        | ns          | ns     | ns               | ns          | ns      | ns         | ns         | ns       | ns           | ns   | ns           | ns             | ns          | ns     | ns     | ns     | ns           | ns              | •       | ns     | ns           | ns    | ns      | ns        | 2     |
| <b>chrD1</b><br><b>18390852</b>  | ns      | ns        | ns         | ns            | ns        | ns          | •      | ns               | ns          | ns      | ns         | ns         | ns       | ns           | ns   | •            | •              | ns          | ns     | •      | ns     | •            | ns              | ns      | ns     | ns           | ns    | ns      | ns        | 5     |
| <b>chrD1</b><br><b>18570323</b>  | ns      | •         | ns         | ns            | •         | ns          | ns     | ns               | ns          | ns      | ns         | ns         | ns       | ns           | ns   | ns           | ns             | ns          | ns     | ns     | ns     | •            | ns              | ns      | ns     | •            | ns    | ns      | ns        | 4     |





|                                 | Persian | Exotic SH | British SH | Scottish Fold | Chartreux | American SH | Sphynx | Japanese Bobtail | Cornish Rex | Ragdoll | Maine Coon | Abyssinian | Siberian | Norwegian FC | Manx | Egyptian Mau | Turkish Angora | Turkish Van | Bengal | Sokoke | Ocicat | Russian Blue | Australian Mist | Burmese | Birman | Havana Brown | Korat | Siamese | Singapura | Total |
|---------------------------------|---------|-----------|------------|---------------|-----------|-------------|--------|------------------|-------------|---------|------------|------------|----------|--------------|------|--------------|----------------|-------------|--------|--------|--------|--------------|-----------------|---------|--------|--------------|-------|---------|-----------|-------|
| <b>chrF1</b><br><b>26100599</b> | ns      | ns        | ns         | ns            | ns        | ns          | ns     | ns               | ns          | ns      | ns         | ns         | ns       | ns           | ns   | ns           | ns             | ns          | ns     | ns     | •      | ns           | ns              | ns      | ns     | ns           | ns    | ns      | ns        | 1     |
| <b>chrF1</b><br><b>27124984</b> | ns      | ns        | •          | ns            | •         | •           | ns     | ns               | ns          | ns      | ns         | ns         | ns       | ns           | ns   | ns           | ns             | ns          | ns     | ns     | •      | ns           | ns              | ns      | ns     | ns           | ns    | ns      | ns        | 4     |
| <b>chrF1</b><br><b>38051725</b> | ns      | ns        | ns         | ns            | ns        | •           | ns     | ns               | ns          | ns      | ns         | ns         | ns       | ns           | ns   | ns           | ns             | ns          | ns     | ns     | ns     | ns           | ns              | ns      | ns     | ns           | ns    | ns      | ns        | 1     |
| <b>chrF1</b><br><b>565223</b>   | •       | ns        | ns         | ns            | ns        | ns          | ns     | ns               | ns          | ns      | ns         | ns         | ns       | ns           | ns   | •            | ns             | ns          | ns     | ns     | ns     | ns           | ns              | ns      | ns     | ns           | ns    | ns      | ns        | 2     |
| <b>chrF1</b><br><b>82068276</b> | ns      | ns        | •          | ns            | ns        | ns          | •      | ns               | ns          | ns      | •          | ns         | •        | ns           | •    | •            | ns             | •           | ns     | ns     | ns     | ns           | •               | ns      | ns     | ns           | ns    | ns      | ns        | 8     |
| <b>chrF1</b><br><b>82716202</b> | ns      | ns        | ns         | ns            | ns        | ns          | ns     | ns               | ns          | ns      | ns         | ns         | •        | ns           | ns   | ns           | ns             | ns          | ns     | ns     | ns     | ns           | ns              | ns      | ns     | ns           | ns    | ns      | ns        | 1     |
| <b>chrF1</b><br><b>91517402</b> | ns      | ns        | •          | ns            | ns        | ns          | ns     | •                | ns          | ns      | ns         | ns         | ns       | ns           | ns   | ns           | ns             | ns          | ns     | ns     | ns     | ns           | ns              | •       | ns     | ns           | ns    | ns      | ns        | 3     |
| <b>chrF2</b><br><b>26886470</b> | ns      | ns        | ns         | ns            | ns        | ns          | ns     | ns               | ns          | •       | ns         | ns         | ns       | ns           | ns   | ns           | ns             | ns          | ns     | ns     | ns     | ns           | ns              | ns      | ns     | •            | ns    | ns      | ns        | 2     |
| <b>chrF2</b><br><b>38395360</b> | ns      | ns        | ns         | ns            | ns        | ns          | ns     | ns               | ns          | ns      | ns         | ns         | ns       | ns           | ns   | •            | ns             | ns          | ns     | ns     | ns     | •            | ns              | ns      | ns     | ns           | ns    | ns      | ns        | 2     |
| <b>chrF2</b><br><b>46855978</b> | •       | •         | ns         | •             | ns        | •           | ns     | •                | ns          | •       | ns         | ns         | •        | •            | •    | •            | •              | •           | ns     | ns     | ns     | •            | •               | •       | •      | •            | •     | •       | •         | 20    |
| <b>chrF2</b><br><b>68572596</b> | •       | ns        | ns         | ns            | ns        | ns          | ns     | ns               | ns          | ns      | ns         | ns         | •        | ns           | ns   | ns           | ns             | ns          | •      | ns     | ns     | ns           | ns              | •       | •      | ns           | ns    | ns      | •         | 6     |
| <b>chrF2</b><br><b>74863327</b> | ns      | •         | ns         | ns            | ns        | ns          | ns     | ns               | ns          | ns      | ns         | ns         | ns       | ns           | ns   | ns           | ns             | ns          | ns     | ns     | ns     | •            | ns              | ns      | ns     | ns           | ns    | ns      | ns        | 2     |
| <b>chrF2</b><br><b>78303221</b> | ns      | ns        | ns         | ns            | ns        | ns          | ns     | ns               | ns          | ns      | ns         | ns         | •        | ns           | ns   | •            | ns             | ns          | ns     | ns     | ns     | ns           | ns              | ns      | ns     | •            | ns    | ns      | ns        | 3     |
| <b>chrF2</b><br><b>79632602</b> | ns      | ns        | ns         | ns            | ns        | ns          | ns     | ns               | ns          | ns      | ns         | ns         | ns       | ns           | ns   | ns           | ns             | ns          | ns     | ns     | ns     | ns           | ns              | ns      | ns     | ns           | ns    | ns      | ns        | 0     |
| <b>chrF2</b><br><b>8427817</b>  | ns      | ns        | ns         | ns            | ns        | ns          | ns     | ns               | ns          | ns      | ns         | ns         | ns       | ns           | ns   | •            | ns             | ns          | ns     | ns     | ns     | ns           | ns              | ns      | ns     | ns           | ns    | ns      | ns        | 1     |
| <b>FCA005</b>                   | ns      | ns        | ns         | ns            | ns        | ns          | ns     | •                | ns          | ns      | ns         | ns         | ns       | ns           | •    | ns           | ns             | ns          | ns     | ns     | ns     | •            | ns              | ns      | ns     | ns           | ns    | ns      | ns        | 3     |
| <b>FCA008</b>                   | ns      | ns        | ns         | ns            | ns        | ns          | ns     | ns               | ns          | ns      | ns         | ns         | ns       | ns           | ns   | ns           | ns             | ns          | ns     | ns     | ns     | •            | ns              | ns      | •      | ns           | ns    | ns      | ns        | 2     |
| <b>FCA023</b>                   | ns      | ns        | ns         | ns            | ns        | ns          | ns     | ns               | ns          | ns      | ns         | ns         | ns       | ns           | •    | ns           | ns             | ns          | ns     | ns     | •      | ns           | ns              | ns      | ns     | ns           | ns    | ns      | ns        | 2     |
| <b>FCA026</b>                   | ns      | ns        | ns         | ns            | ns        | ns          | ns     | ns               | ns          | ns      | ns         | ns         | ns       | ns           | ns   | •            | ns             | ns          | ns     | ns     | ns     | ns           | ns              | ns      | ns     | ns           | ns    | ns      | ns        | 1     |
| <b>FCA035</b>                   | •       | ns        | ns         | •             | ns        | ns          | ns     | •                | ns          | ns      | ns         | ns         | ns       | ns           | •    | ns           | ns             | ns          | •      | ns     | ns     | •            | •               | •       | ns     | ns           | ns    | ns      | ns        | 8     |
| <b>FCA043</b>                   | ns      | ns        | ns         | ns            | •         | ns          | ns     | ns               | ns          | ns      | ns         | ns         | ns       | ns           | ns   | ns           | ns             | ns          | ns     | ns     | ns     | •            | ns              | ns      | ns     | ns           | ns    | ns      | ns        | 2     |
| <b>FCA045</b>                   | ns      | •         | ns         | ns            | ns        | ns          | •      | ns               | ns          | ns      | ns         | •          | •        | ns           | ns   | ns           | ns             | ns          | •      | ns     | •      | ns           | ns              | •       | •      | ns           | ns    | ns      | ns        | 8     |
| <b>FCA058</b>                   | ns      | •         | ns         | ns            | ns        | ns          | •      | ns               | ns          | ns      | •          | ns         | •        | ns           | ns   | ns           | ns             | ns          | ns     | ns     | ns     | ns           | •               | ns      | ns     | ns           | ns    | ns      | ns        | 5     |



|              | Persian   | Exotic SH | British SH | Scottish Fold | Chartreux | American SH | Sphynx    | Japanese Bobtail | Cornish Rex | Ragdoll   | Maine Coon | Abyssinian | Siberian  | Norwegian FC | Manx      | Egyptian Mau | Turkish Angora | Turkish Van | Bengal    | Sokoke    | Ocicat    | Russian Blue | Australian Mist | Burmese   | Birman    | Havana Brown | Korat     | Siamese   | Singapura | Total |
|--------------|-----------|-----------|------------|---------------|-----------|-------------|-----------|------------------|-------------|-----------|------------|------------|-----------|--------------|-----------|--------------|----------------|-------------|-----------|-----------|-----------|--------------|-----------------|-----------|-----------|--------------|-----------|-----------|-----------|-------|
| FCA069       | ns        | ns        | ns         | ns            | ns        | ns          | ns        | ns               | ns          | ns        | ns         | ns         | ns        | ns           | ns        | ns           | ns             | ns          | ns        | ns        | ns        | ns           | ns              | ns        | ns        | ns           | ns        | ns        | ns        | 0     |
| FCA075       | ns        | ns        | ns         | ns            | ns        | ns          | ns        | •                | ns          | ns        | ns         | ns         | ns        | •            | ns        | •            | •              | ns          | ns        | •         | ns        | •            | ns              | ns        | ns        | ns           | ns        | ns        | ns        | 6     |
| FCA077       | ns        | •         | ns         | ns            | •         | ns          | •         | ns               | ns          | ns        | ns         | •          | ns        | ns           | •         | •            | •              | ns          | •         | ns        | •         | ns           | •               | ns        | ns        | ns           | ns        | ns        | ns        | 9     |
| FCA080B      | ns        | ns        | ns         | ns            | ns        | ns          | ns        | •                | ns          | •         | ns         | ns         | ns        | ns           | ns        | ns           | ns             | ns          | ns        | ns        | ns        | ns           | ns              | ns        | •         | ns           | ns        | ns        | ns        | 3     |
| FCA088       | •         | •         | •          | •             | ns        | •           | •         | ns               | •           | •         | •          | ns         | ns        | ns           | •         | •            | ns             | ns          | ns        | ns        | ns        | ns           | ns              | •         | ns        | ns           | ns        | ns        | ns        | 12    |
| FCA090       | ns        | ns        | ns         | ns            | ns        | ns          | ns        | ns               | ns          | ns        | ns         | ns         | ns        | ns           | ns        | ns           | ns             | •           | ns        | ns        | ns        | ns           | ns              | ns        | ns        | •            | ns        | ns        | 2         |       |
| FCA094       | ns        | ns        | ns         | ns            | ns        | ns          | ns        | ns               | ns          | ns        | ns         | ns         | ns        | ns           | ns        | ns           | ns             | •           | ns        | ns        | ns        | ns           | ns              | ns        | ns        | ns           | ns        | ns        | ns        | 1     |
| FCA096       | ns        | ns        | ns         | •             | ns        | ns          | ns        | ns               | ns          | •         | ns         | ns         | •         | ns           | ns        | ns           | ns             | •           | ns        | ns        | ns        | ns           | ns              | ns        | •         | •            | ns        | ns        | ns        | 6     |
| FCA097       | ns        | ns        | ns         | ns            | ns        | ns          | ns        | ns               | ns          | ns        | ns         | ns         | ns        | ns           | ns        | ns           | ns             | ns          | ns        | ns        | ns        | ns           | ns              | ns        | ns        | ns           | ns        | •         | ns        | 1     |
| FCA105       | ns        | ns        | ns         | •             | ns        | •           | ns        | ns               | ns          | ns        | ns         | ns         | ns        | ns           | ns        | ns           | ns             | •           | ns        | ns        | ns        | ns           | ns              | ns        | ns        | ns           | ns        | ns        | ns        | 3     |
| FCA123       | ns        | ns        | ns         | ns            | ns        | ns          | ns        | •                | ns          | ns        | ns         | ns         | •         | ns           | ns        | ns           | ns             | ns          | ns        | ns        | ns        | ns           | ns              | ns        | ns        | ns           | ns        | ns        | ns        | 2     |
| FCA126       | •         | ns        | ns         | ns            | ns        | ns          | ns        | ns               | ns          | ns        | ns         | ns         | ns        | ns           | ns        | ns           | •              | •           | ns        | ns        | ns        | ns           | ns              | ns        | ns        | ns           | ns        | ns        | •         | 4     |
| FCA132       | ns        | ns        | ns         | ns            | •         | ns          | ns        | ns               | ns          | ns        | ns         | ns         | ns        | ns           | ns        | ns           | ns             | ns          | ns        | ns        | ns        | •            | ns              | •         | ns        | ns           | •         | ns        | ns        | 4     |
| FCA149       | ns        | ns        | ns         | •             | •         | ns          | ns        | ns               | ns          | ns        | ns         | ns         | ns        | ns           | ns        | •            | ns             | ns          | ns        | ns        | ns        | ns           | ns              | ns        | •         | ns           | ns        | ns        | ns        | 4     |
| FCA211       | ns        | ns        | •          | ns            | ns        | ns          | ns        | ns               | ns          | ns        | ns         | ns         | ns        | ns           | ns        | ns           | ns             | ns          | ns        | ns        | ns        | ns           | ns              | ns        | ns        | ns           | •         | ns        | ns        | 2     |
| FCA220       | ns        | ns        | ns         | ns            | ns        | ns          | ns        | •                | ns          | ns        | ns         | ns         | ns        | ns           | •         | ns           | ns             | ns          | •         | ns        | ns        | ns           | ns              | ns        | ns        | ns           | ns        | ns        | ns        | 3     |
| FCA223       | ns        | ns        | •          | ns            | ns        | ns          | ns        | ns               | ns          | ns        | ns         | •          | •         | ns           | ns        | •            | ns             | •           | ns        | •         | ns        | ns           | ns              | ns        | ns        | ns           | ns        | •         | ns        | 7     |
| FCA224       | ns        | ns        | ns         | ns            | ns        | ns          | ns        | ns               | ns          | ns        | •          | ns         | ns        | ns           | •         | ns           | •              | ns          | ns        | ns        | ns        | ns           | ns              | ns        | •         | ns           | ns        | ns        | ns        | 4     |
| FCA229       | ns        | •         | ns         | ns            | •         | ns          | ns        | ns               | ns          | •         | ns         | ns         | ns        | ns           | ns        | ns           | ns             | •           | ns        | ns        | ns        | ns           | •               | ns        | ns        | ns           | ns        | ns        | ns        | 5     |
| FCA262       | •         | ns        | ns         | ns            | ns        | ns          | ns        | ns               | ns          | •         | ns         | ns         | ns        | ns           | ns        | •            | ns             | •           | ns        | ns        | ns        | ns           | ns              | ns        | •         | ns           | •         | ns        | ns        | 6     |
| FCA293       | ns        | ns        | ns         | ns            | ns        | ns          | ns        | ns               | ns          | ns        | ns         | ns         | ns        | ns           | ns        | ns           | ns             | ns          | ns        | ns        | ns        | •            | ns              | ns        | ns        | ns           | ns        | ns        | ns        | 1     |
| FCA305       | ns        | ns        | ns         | ns            | ns        | ns          | •         | ns               | ns          | ns        | ns         | •          | ns        | •            | ns        | ns           | ns             | ns          | •         | ns        | ns        | ns           | ns              | ns        | ns        | ns           | ns        | ns        | ns        | 4     |
| FCA310       | ns        | ns        | ns         | ns            | ns        | ns          | ns        | ns               | ns          | ns        | ns         | ns         | ns        | ns           | ns        | ns           | ns             | ns          | ns        | ns        | ns        | ns           | ns              | ns        | ns        | ns           | ns        | ns        | ns        | 0     |
| FCA391       | ns        | •         | •          | ns            | ns        | •           | ns        | •                | ns          | •         | •          | •          | ns        | •            | ns        | •            | ns             | •           | ns        | ns        | ns        | •            | ns              | ns        | ns        | ns           | ns        | ns        | ns        | 11    |
| FCA441       | ns        | ns        | ns         | ns            | ns        | ns          | ns        | ns               | ns          | ns        | ns         | ns         | ns        | ns           | ns        | ns           | ns             | ns          | ns        | •         | ns        | ns           | ns              | ns        | ns        | ns           | ns        | ns        | ns        | 1     |
| FCA453       | ns        | ns        | ns         | ns            | ns        | ns          | ns        | ns               | ns          | ns        | ns         | ns         | ns        | ns           | ns        | ns           | ns             | ns          | •         | ns        | ns        | ns           | ns              | ns        | ns        | ns           | ns        | ns        | ns        | 1     |
| FCA628       | ns        | ns        | ns         | ns            | ns        | ns          | ns        | ns               | ns          | ns        | •          | ns         | ns        | ns           | ns        | ns           | ns             | ns          | ns        | ns        | ns        | ns           | ns              | •         | ns        | ns           | •         | •         | ns        | 4     |
| FCA649       | ns        | ns        | ns         | •             | ns        | •           | ns        | ns               | ns          | ns        | •          | ns         | ns        | ns           | ns        | ns           | ns             | ns          | ns        | •         | ns        | ns           | ns              | ns        | ns        | ns           | •         | ns        | ns        | 5     |
| FCA678       | ns        | ns        | ns         | ns            | ns        | ns          | ns        | ns               | ns          | ns        | •          | ns         | ns        | ns           | ns        | ns           | ns             | •           | ns        | ns        | ns        | ns           | ns              | ns        | ns        | ns           | ns        | ns        | •         | 3     |
| FCA698       | •         | ns        | ns         | ns            | ns        | ns          | ns        | ns               | ns          | ns        | ns         | ns         | ns        | •            | ns        | ns           | ns             | ns          | ns        | ns        | ns        | ns           | ns              | ns        | ns        | ns           | ns        | ns        | ns        | 2     |
| <b>Total</b> | <b>14</b> | <b>21</b> | <b>17</b>  | <b>11</b>     | <b>18</b> | <b>21</b>   | <b>20</b> | <b>25</b>        | <b>13</b>   | <b>11</b> | <b>23</b>  | <b>17</b>  | <b>20</b> | <b>16</b>    | <b>15</b> | <b>25</b>    | <b>25</b>      | <b>31</b>   | <b>14</b> | <b>14</b> | <b>10</b> | <b>33</b>    | <b>12</b>       | <b>17</b> | <b>23</b> | <b>16</b>    | <b>18</b> | <b>13</b> | <b>16</b> |       |

ns, not significantly out of Hardy-Weinberg Equilibrium; •, significantly out of HWE with p-value < 0.05.
