# Supplementary material
Source: PubMed Central journal article supplement (PMC3594446)
Supplement: NIHMS415350-supplement-Supp_TableS3.pdf [file NIHMS415350-supplement-Supp_TableS3.pdf]

**Table S3. (a) SNP assignment of cat breeds to random bred cat populations.**

| Breed             | SNPs (N=148)      |         |          |         |          |             |         |            |           |
|-------------------|-------------------|---------|----------|---------|----------|-------------|---------|------------|-----------|
|                   | Racial Assignment | -log(L) |          |         |          |             |         |            |           |
|                   |                   | Europe  | East Med | Egypt   | IraqIran | Arabian Sea | India   | South Asia | East Asia |
| Abyssinian        | Europe            | 425.881 | 506.972  | 520.173 | 739.043  | 523.387     | 571.166 | 539.713    | 582.183   |
| American SH       | Europe            | 214.445 | 294.034  | 300.891 | 436.278  | 342.32      | 356.071 | 430.155    | 363.917   |
| Australian Mist   | South Asia        | 366.442 | 372.814  | 392.118 | 473.959  | 391.023     | 357.53  | 299.831    | 371.146   |
| Bengal*           | Europe            | 277.481 | 312.259  | 314.506 | 444.415  | 343.165     | 327.977 | 410.917    | 369.303   |
| Birman            | South Asia        | 562.439 | 514.619  | 489.325 | 571.811  | 466.884     | 398.272 | 357.638    | 494.121   |
| British SH        | Europe            | 266.189 | 351.574  | 383.015 | 509.425  | 386.181     | 402.229 | 499.062    | 426.489   |
| Burmese           | South Asia        | 537.957 | 494.594  | 510.756 | 554.652  | 452.18      | 353.1   | 232.359    | 408.667   |
| Chartreux         | Europe            | 243.214 | 287.905  | 310.595 | 392.542  | 328.31      | 306.122 | 390.676    | 340.836   |
| Cornish Rex       | Europe            | 317.191 | 368.372  | 358.46  | 488.121  | 383.104     | 360.937 | 413.799    | 403.094   |
| Egyptian Mau      | Europe            | 278.503 | 303.627  | 303.291 | 421.446  | 345.331     | 349.259 | 422.453    | 366.832   |
| Exotic SH         | Europe            | 275.475 | 367.195  | 380.41  | 532.774  | 391.854     | 408.132 | 500.594    | 423.104   |
| H. Brown          | South Asia        | 498.346 | 470.353  | 477.771 | 538.807  | 421.824     | 376.835 | 266.337    | 404.7     |
| Japanese Bobtail  | Europe            | 241.661 | 256.018  | 267.56  | 369.44   | 306.997     | 289.681 | 354.146    | 274.931   |
| Korat             | South Asia        | 783.086 | 710.194  | 728.915 | 728.005  | 569.748     | 497.518 | 241.988    | 544.729   |
| Maine Coon        | Europe            | 233.644 | 336.954  | 359.517 | 507.38   | 383.73      | 400.377 | 481.154    | 409.93    |
| Manx              | Europe            | 183.172 | 266.261  | 293.483 | 465.86   | 343.149     | 354.55  | 469.19     | 382.31    |
| Norwegian Forrest | Europe            | 186.918 | 268.319  | 297.021 | 459.99   | 364.374     | 361.486 | 460.332    | 367.953   |
| Ocicat*           | South Asia        | 250.81  | 272.05   | 285.371 | 362.082  | 289.028     | 245.677 | 244.482    | 272.293   |
| Persian           | Europe            | 210.224 | 280.822  | 298.776 | 425.561  | 327.435     | 320.381 | 410.002    | 328.219   |
| Ragdoll           | Europe            | 238.285 | 277.549  | 295.736 | 393.95   | 342.598     | 302.199 | 364.068    | 309.321   |
| Russian Blue      | South Asia        | 426.363 | 443.64   | 443.657 | 549.342  | 451.198     | 439.924 | 406.281    | 478.247   |
| Scottish Fold     | Europe            | 285.089 | 410.698  | 439.66  | 579.88   | 419.796     | 453.876 | 548.531    | 480.68    |
| Siamese           | South Asia        | 521.766 | 481.206  | 493.075 | 520.538  | 417.91      | 356.165 | 196.049    | 363.29    |
| Siberian          | Europe            | 177.505 | 205.628  | 244.135 | 368.507  | 282.501     | 286.135 | 350.747    | 277.186   |
| Singapura         | South Asia        | 610.855 | 635.495  | 634.003 | 697.695  | 541.126     | 518.324 | 402.416    | 539.635   |
| Sokoke            | Arabian Sea       | 215.491 | 213.151  | 215.151 | 222.711  | 175.088     | 194.761 | 214.181    | 212.471   |
| Sphynx            | Europe            | 229.867 | 268.333  | 294.366 | 421.316  | 343.479     | 304.696 | 385.86     | 333.086   |
| Turkish Angora*   | Europe            | 206.309 | 215.369  | 239.522 | 346.148  | 308.088     | 297.611 | 395.989    | 324.211   |
| Turksih Van       | East Med          | 251.489 | 233.29   | 268.56  | 383.923  | 339.409     | 320.684 | 396.447    | 367.681   |

\* breeds assigned to different origins based on the genetic marker type. Likelihood values presented are negative log-likelihood values –the closer to zero, the more likely the assignment.

**Table S3. (b) STR assignment of cat breeds to random bred cat populations.**

| Breed             | STRs (N=38)       |         |          |         |          |             |         |            |           |
|-------------------|-------------------|---------|----------|---------|----------|-------------|---------|------------|-----------|
|                   | Racial Assignment | -log(L) |          |         |          |             |         |            |           |
|                   |                   | Europe  | East Med | Egypt   | IraqIran | Arabian Sea | India   | South Asia | East Asia |
| Abyssinian        | Europe            | 391.775 | 431.049  | 448.175 | 569.783  | 452.082     | 452.751 | 420.303    | 462.802   |
| American SH       | Europe            | 284.004 | 352.415  | 373.617 | 519.61   | 407.953     | 404.881 | 411.122    | 413.971   |
| Australian Mist   | South Asia        | 372.752 | 415.4    | 428.335 | 503.159  | 433.821     | 388.385 | 318.639    | 384.275   |
| Bengal*           | Arabian Sea       | 496.347 | 512.793  | 499.54  | 583.542  | 490.251     | 513.431 | 503.627    | 594.543   |
| Birman            | South Asia        | 619.802 | 624.199  | 691.233 | 784.48   | 627.696     | 611.122 | 404.846    | 619.715   |
| British SH        | Europe            | 365.836 | 462.364  | 494.534 | 697.257  | 542.932     | 520.762 | 538.64     | 553.998   |
| Burmese           | South Asia        | 538.86  | 574.707  | 602.871 | 650.149  | 543.725     | 469.352 | 328.296    | 480.689   |
| Chartreux         | Europe            | 288.091 | 333.218  | 364.422 | 471.369  | 420.547     | 380.17  | 383.442    | 377.357   |
| Cornish Rex       | Europe            | 369.25  | 437.788  | 446.038 | 555.609  | 468.858     | 428.47  | 394.753    | 477.392   |
| Egyptian Mau      | Europe            | 322.916 | 350.668  | 362.843 | 446.658  | 386.768     | 374.387 | 399.565    | 412.49    |
| Exotic SH         | Europe            | 431.298 | 514.268  | 536.769 | 706.318  | 563.227     | 579.773 | 541.912    | 574.013   |
| H. Brown          | South Asia        | 405.814 | 452.844  | 463.474 | 490.494  | 410.516     | 391.736 | 290.886    | 348.305   |
| Japanese Bobtail  | Europe            | 442.684 | 492.594  | 504.049 | 586.241  | 498.245     | 472.916 | 486.841    | 466.728   |
| Korat             | South Asia        | 724.631 | 720.932  | 769.557 | 773.995  | 605.694     | 574.06  | 298.912    | 623.147   |
| Maine Coon        | Europe            | 325.993 | 413.915  | 454.08  | 635.061  | 519.562     | 481.193 | 513.901    | 510.841   |
| Manx              | Europe            | 280.006 | 354.58   | 393.541 | 589.955  | 496.761     | 463.125 | 499.578    | 482.289   |
| Norwegian Forrest | Europe            | 265.706 | 325.855  | 373.736 | 530.702  | 476.455     | 437.795 | 466.9      | 454.453   |
| Ocicat*           | Europe            | 283.111 | 305.428  | 301.617 | 383.669  | 328.11      | 300.313 | 287.939    | 319.107   |
| Persian           | Europe            | 304.615 | 380.994  | 409.462 | 529.928  | 455.066     | 438.168 | 449.052    | 414.575   |
| Ragdoll           | Europe            | 341.134 | 393.51   | 404.545 | 592.622  | 471.899     | 425.202 | 397.716    | 405.643   |
| Russian Blue      | South Asia        | 459.628 | 550.271  | 565.88  | 694.372  | 553.199     | 522.684 | 440.046    | 531.117   |
| Scottish Fold     | Europe            | 353.106 | 438.254  | 455.217 | 674.159  | 506.12      | 514.422 | 530.18     | 525.99    |
| Siamese           | South Asia        | 440.302 | 476.476  | 511.011 | 515.028  | 452.232     | 377.384 | 268.941    | 373.961   |
| Siberian          | Europe            | 272.587 | 305.993  | 346.585 | 514.722  | 453.233     | 405.521 | 428.93     | 411.038   |
| Singapura         | South Asia        | 529.943 | 593.678  | 581.331 | 723.339  | 530.853     | 516.217 | 377.292    | 562.624   |
| Sokoke            | Arabian Sea       | 275.548 | 271.011  | 274.846 | 286.448  | 218.947     | 248.466 | 244.002    | 300.134   |
| Sphynx            | Europe            | 381.955 | 446.644  | 456.938 | 607.529  | 461.321     | 471.637 | 426.769    | 491.009   |
| Turkish Angora*   | East Med          | 398.178 | 381.553  | 406.446 | 556.699  | 524.253     | 483.876 | 549.764    | 539.647   |
| Turksih Van       | East Med          | 452.401 | 387.724  | 427.429 | 577.663  | 525.23      | 477.131 | 505.265    | 549.053   |

\* breeds assigned to different origins based on the genetic marker type. Likelihood values presented are negative log-likelihood values –the closer to zero, the more likely the assignment.
